# Supplementary material for: LncRNA-PACERR induces pro-tumour macrophages via interacting with miR-671-3p and m6A-reader IGF2BP2 in pancreatic ductal adenocarcinoma
Source: PubMed Central journal article supplement (PMC9077921; doi:10.1186/s13045-022-01272-w), 2022-05-07
Supplement: 13045_2022_1272_MOESM6_ESM.pdf [file 13045_2022_1272_MOESM6_ESM.pdf]

**a**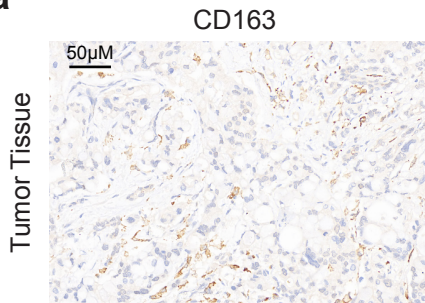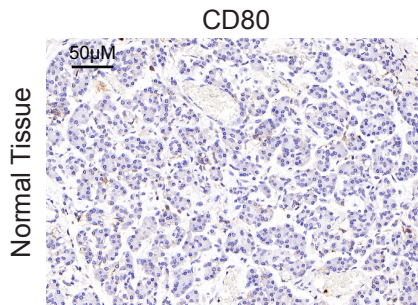**b**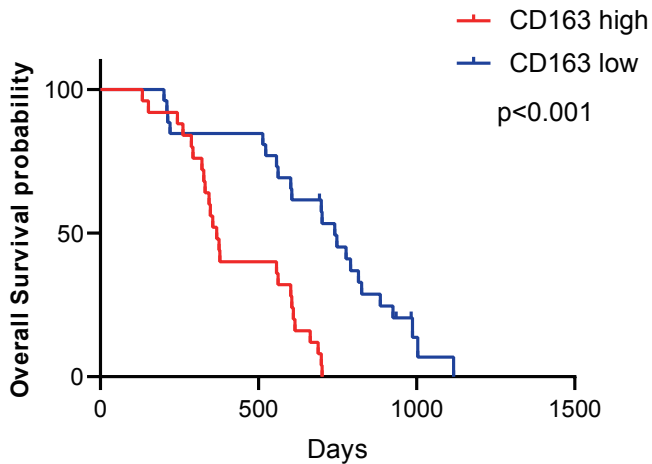**Figure S1**

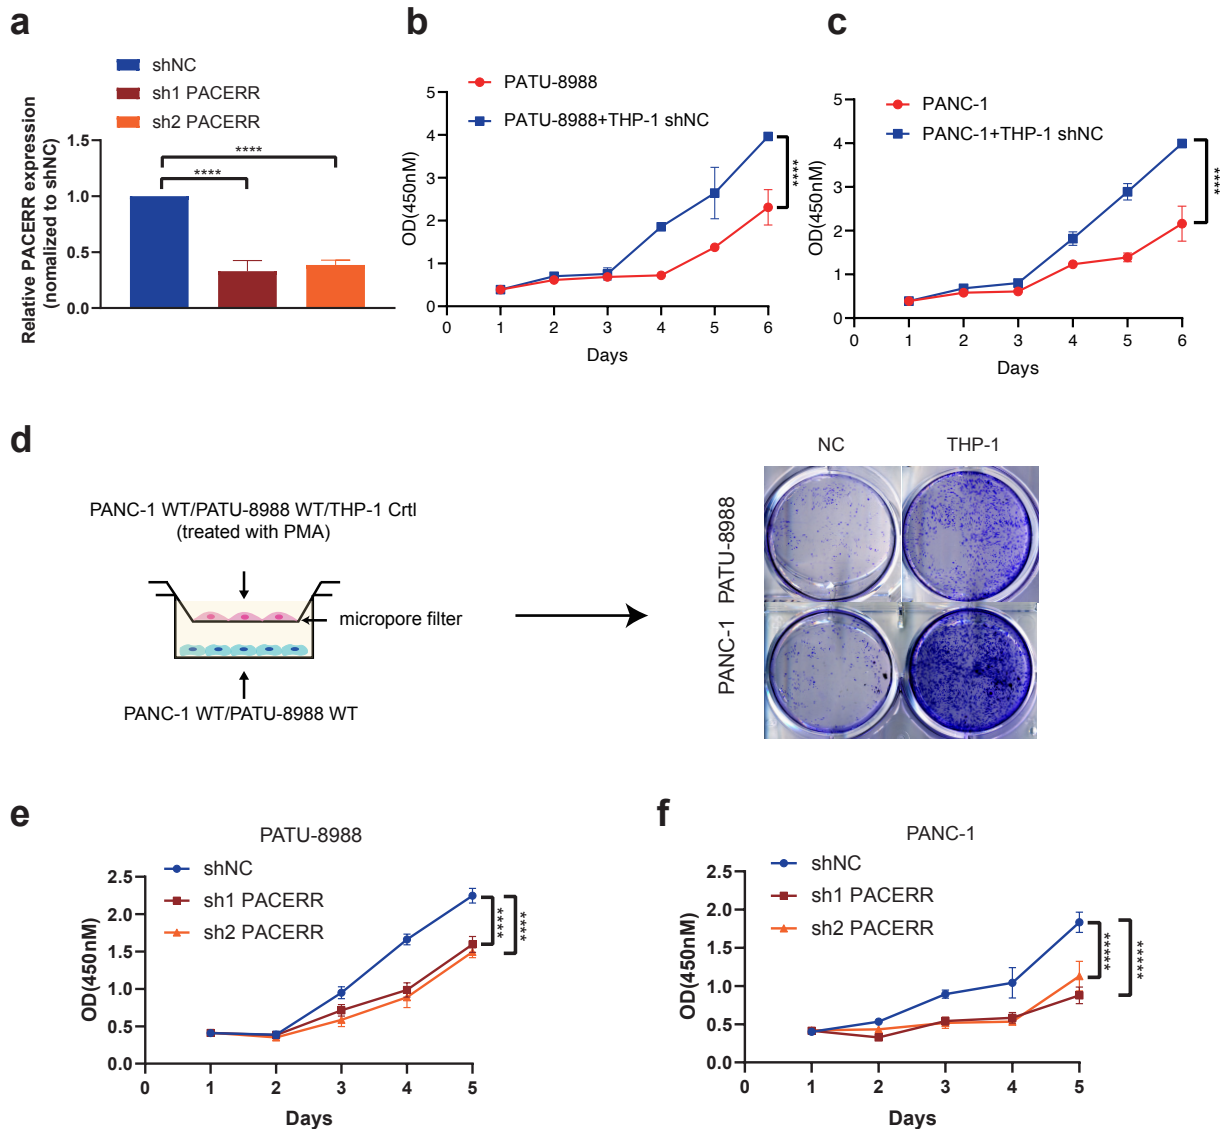

Figure S2

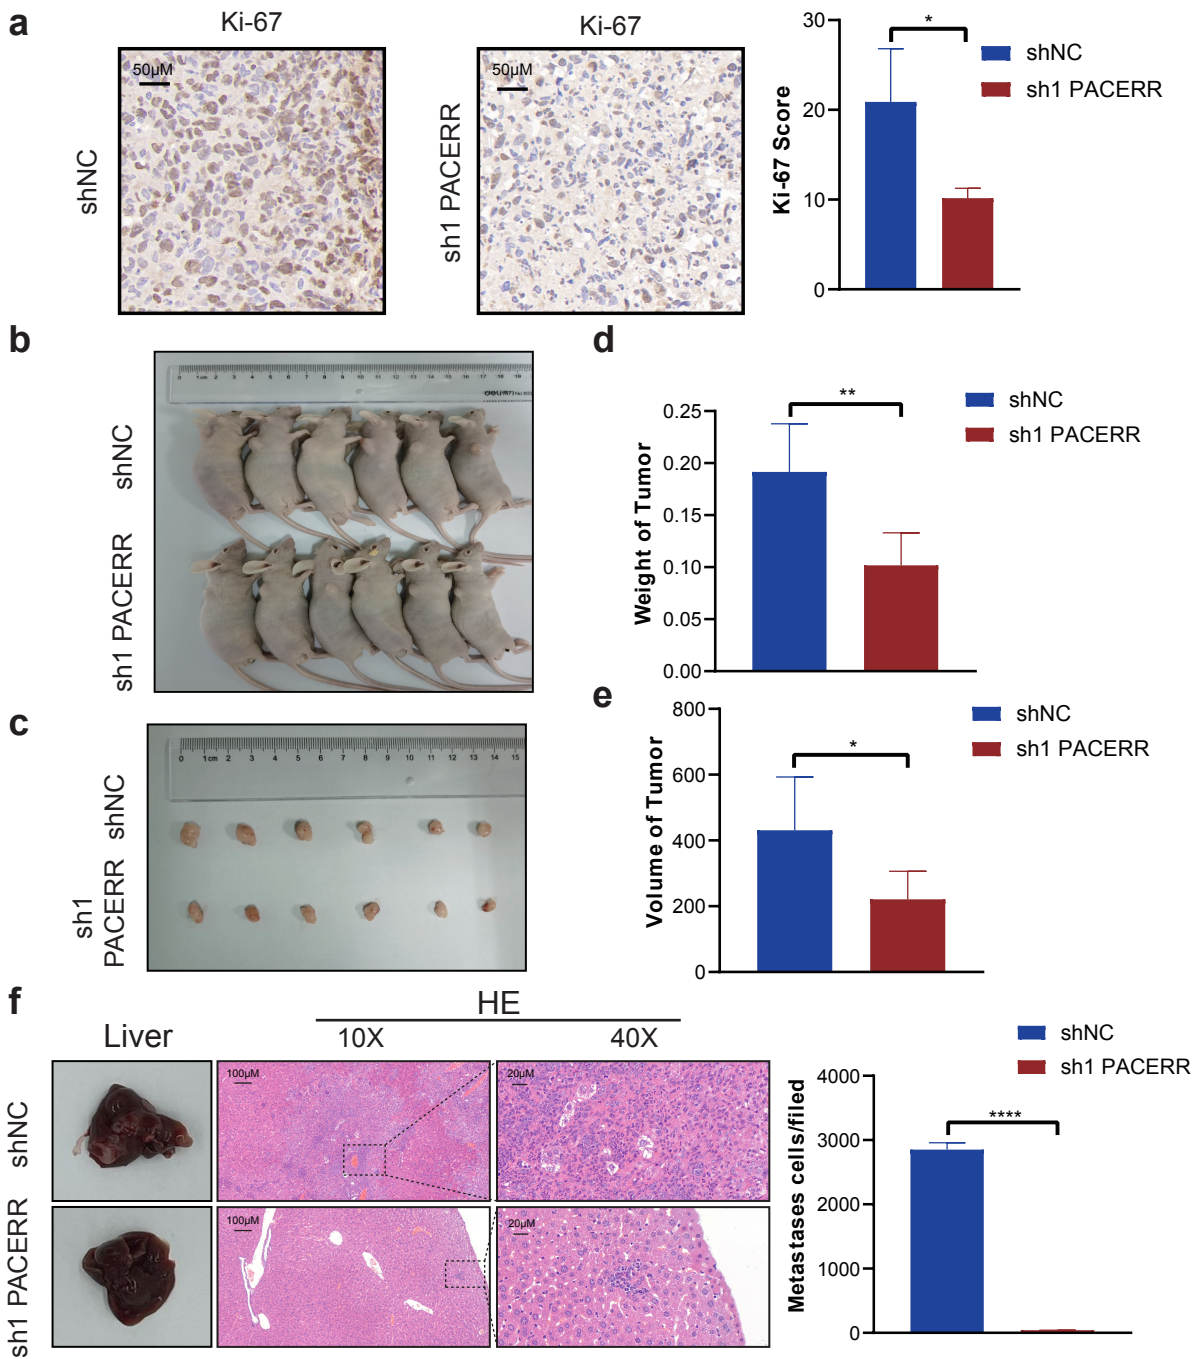

**Figure S3**

**a**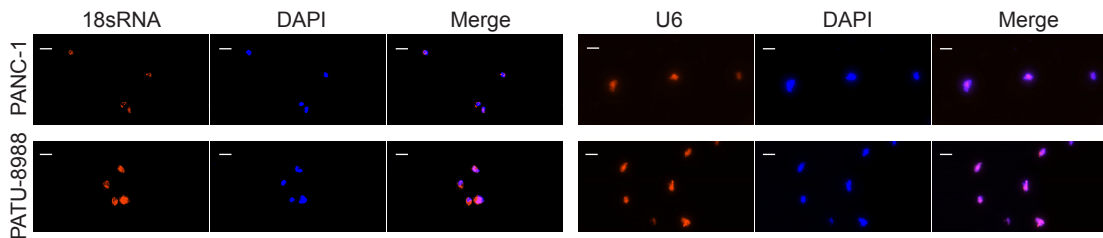**b**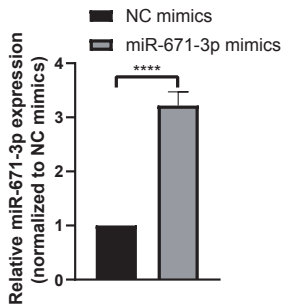**c**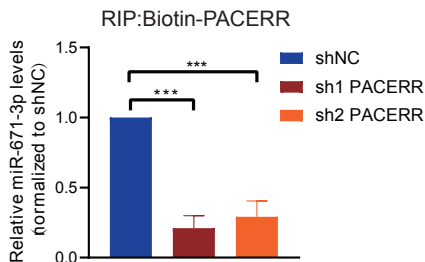**d**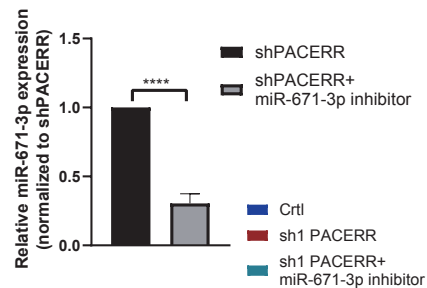**e**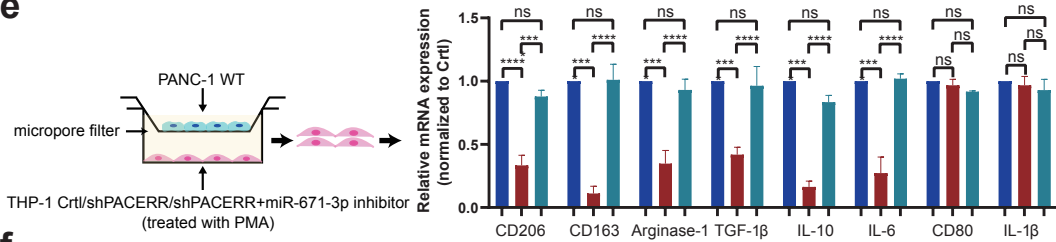**f**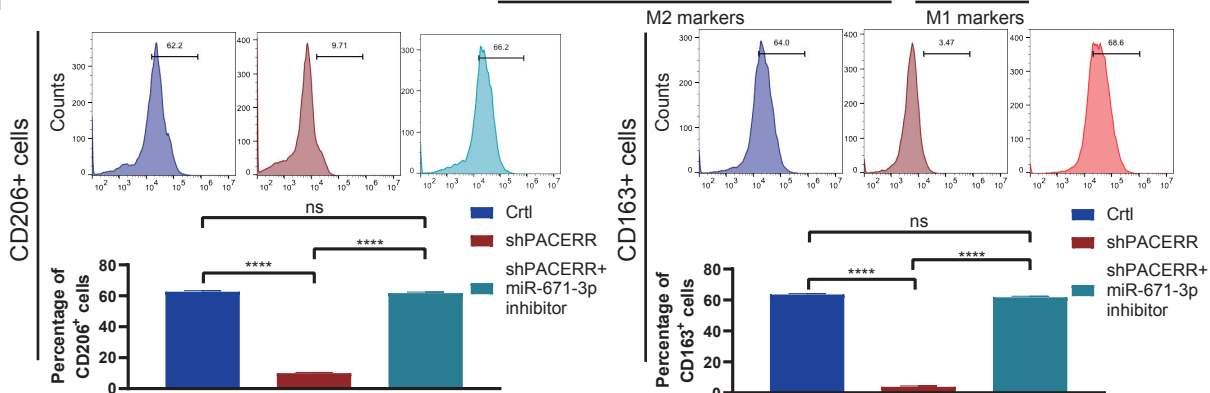**Figure S4**



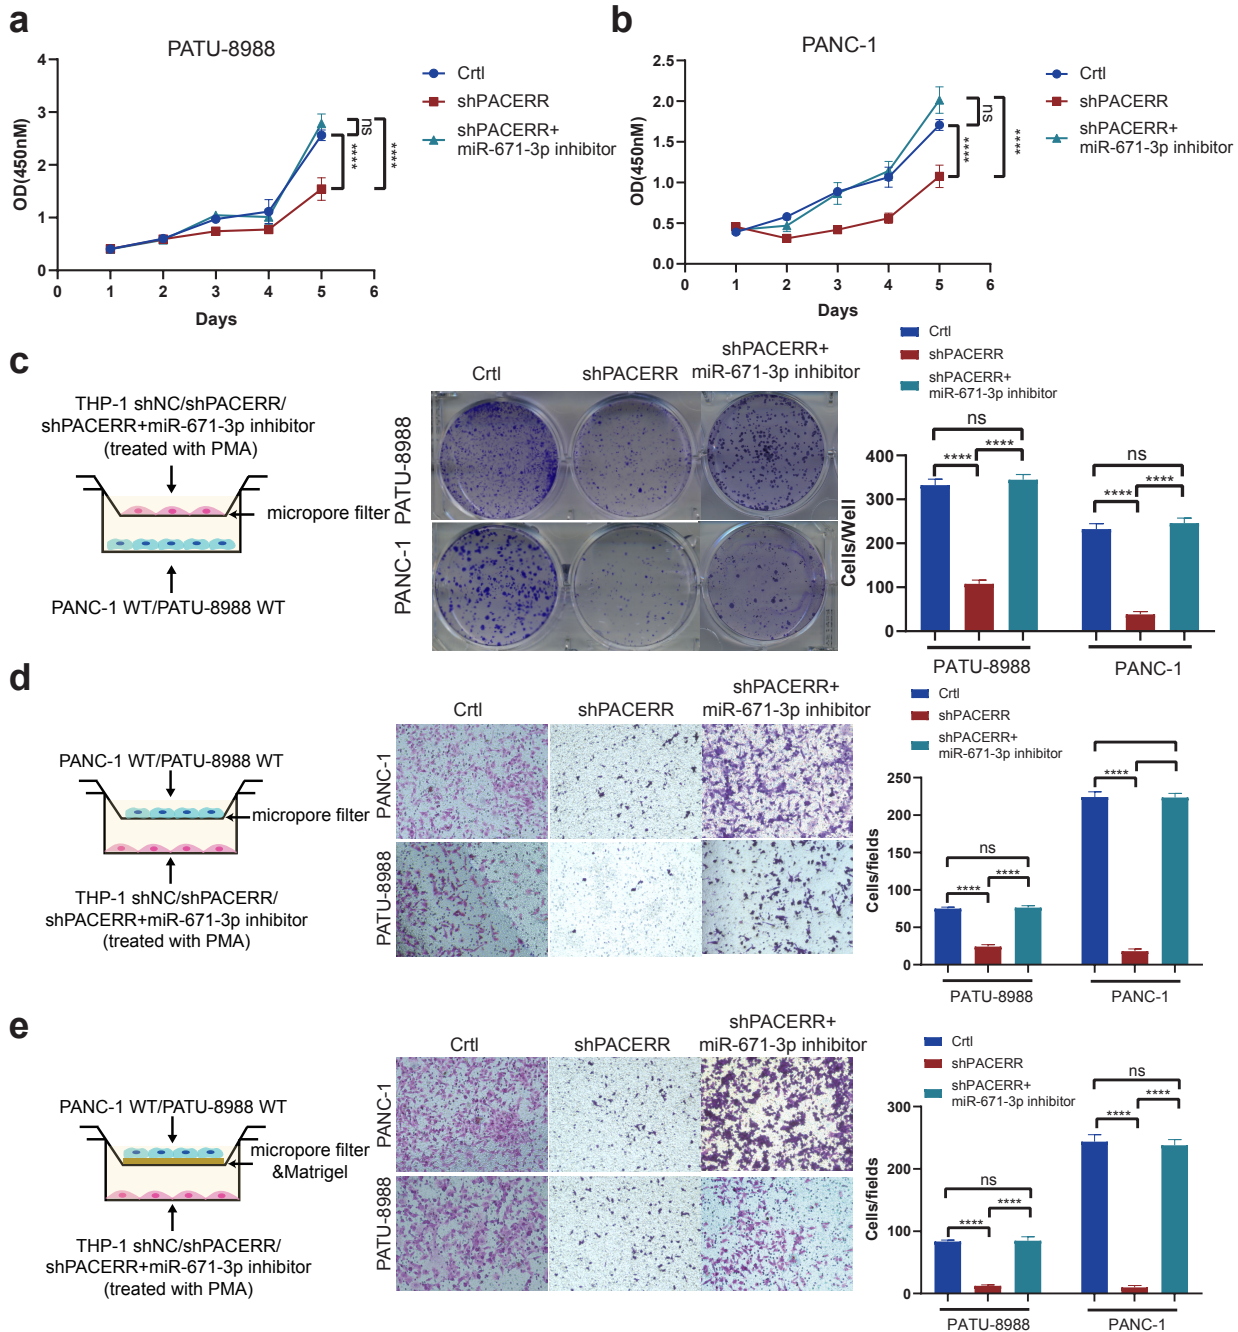

**Figure S5**

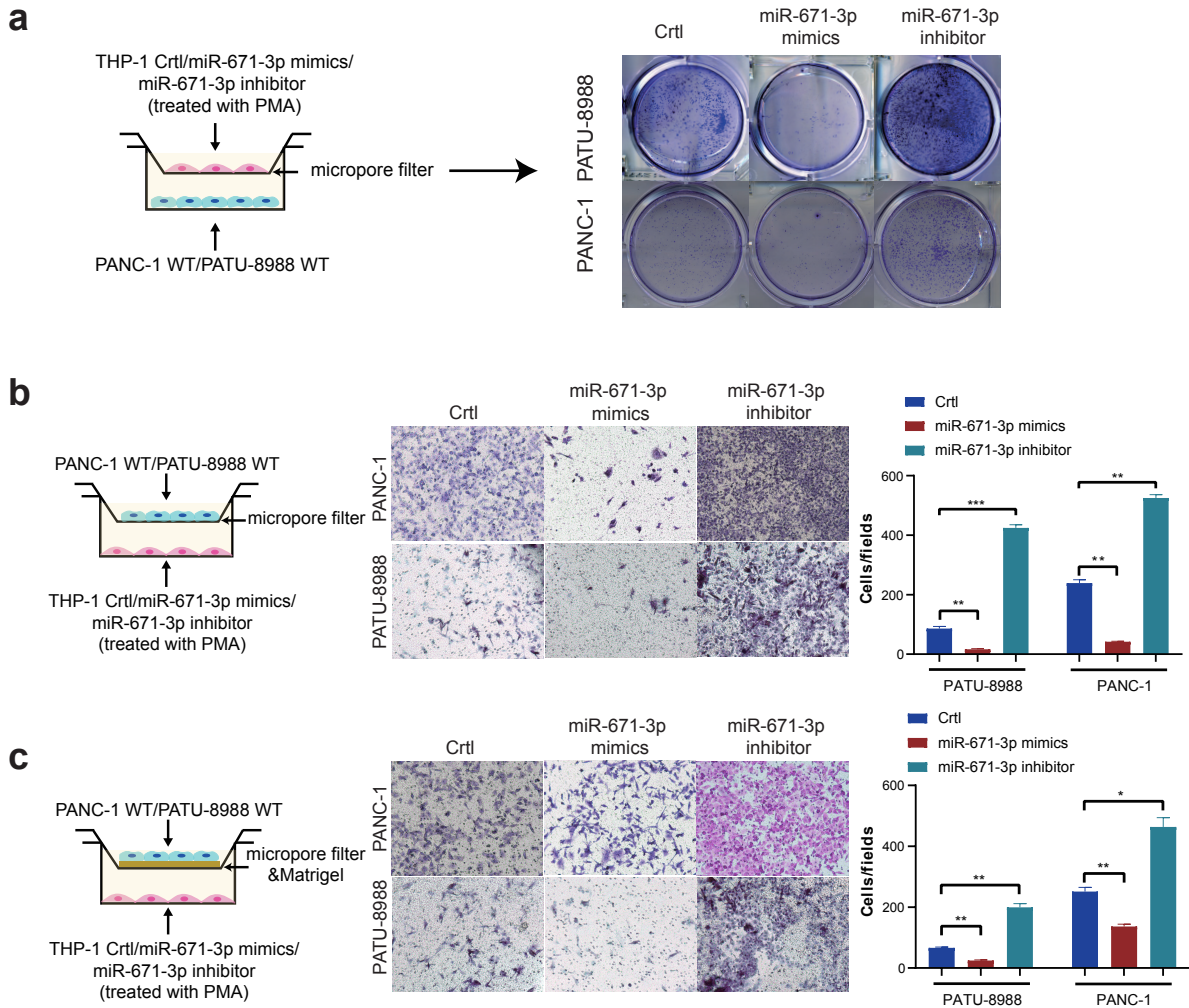

**Figure S6**

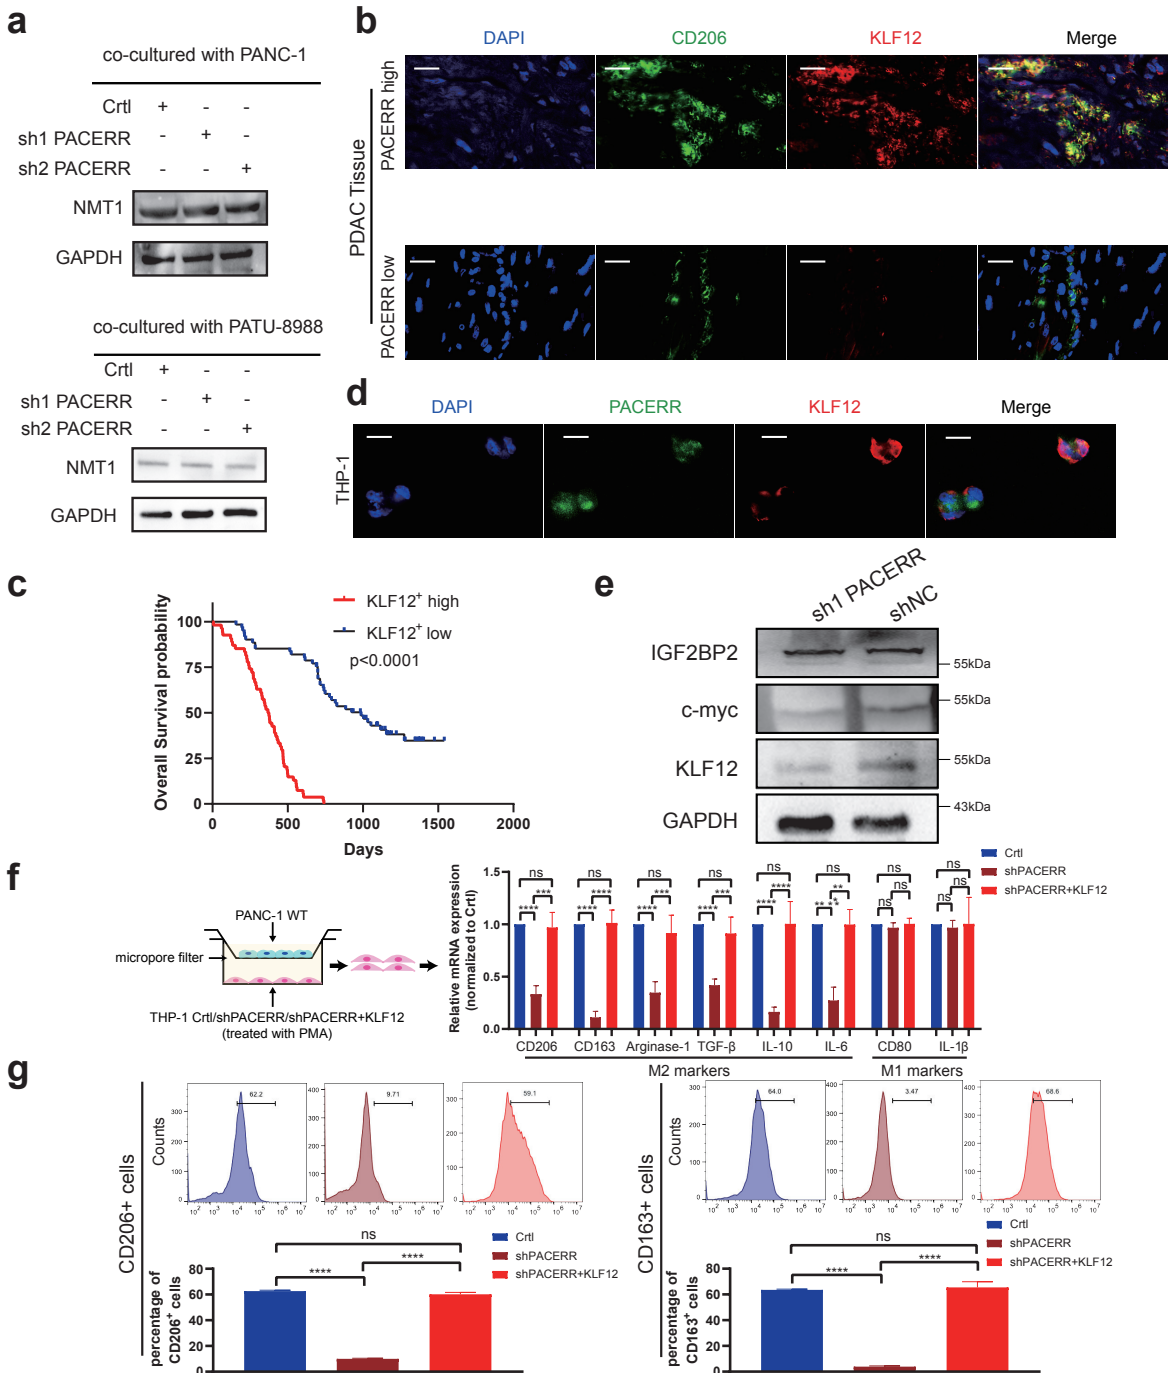

Figure S7

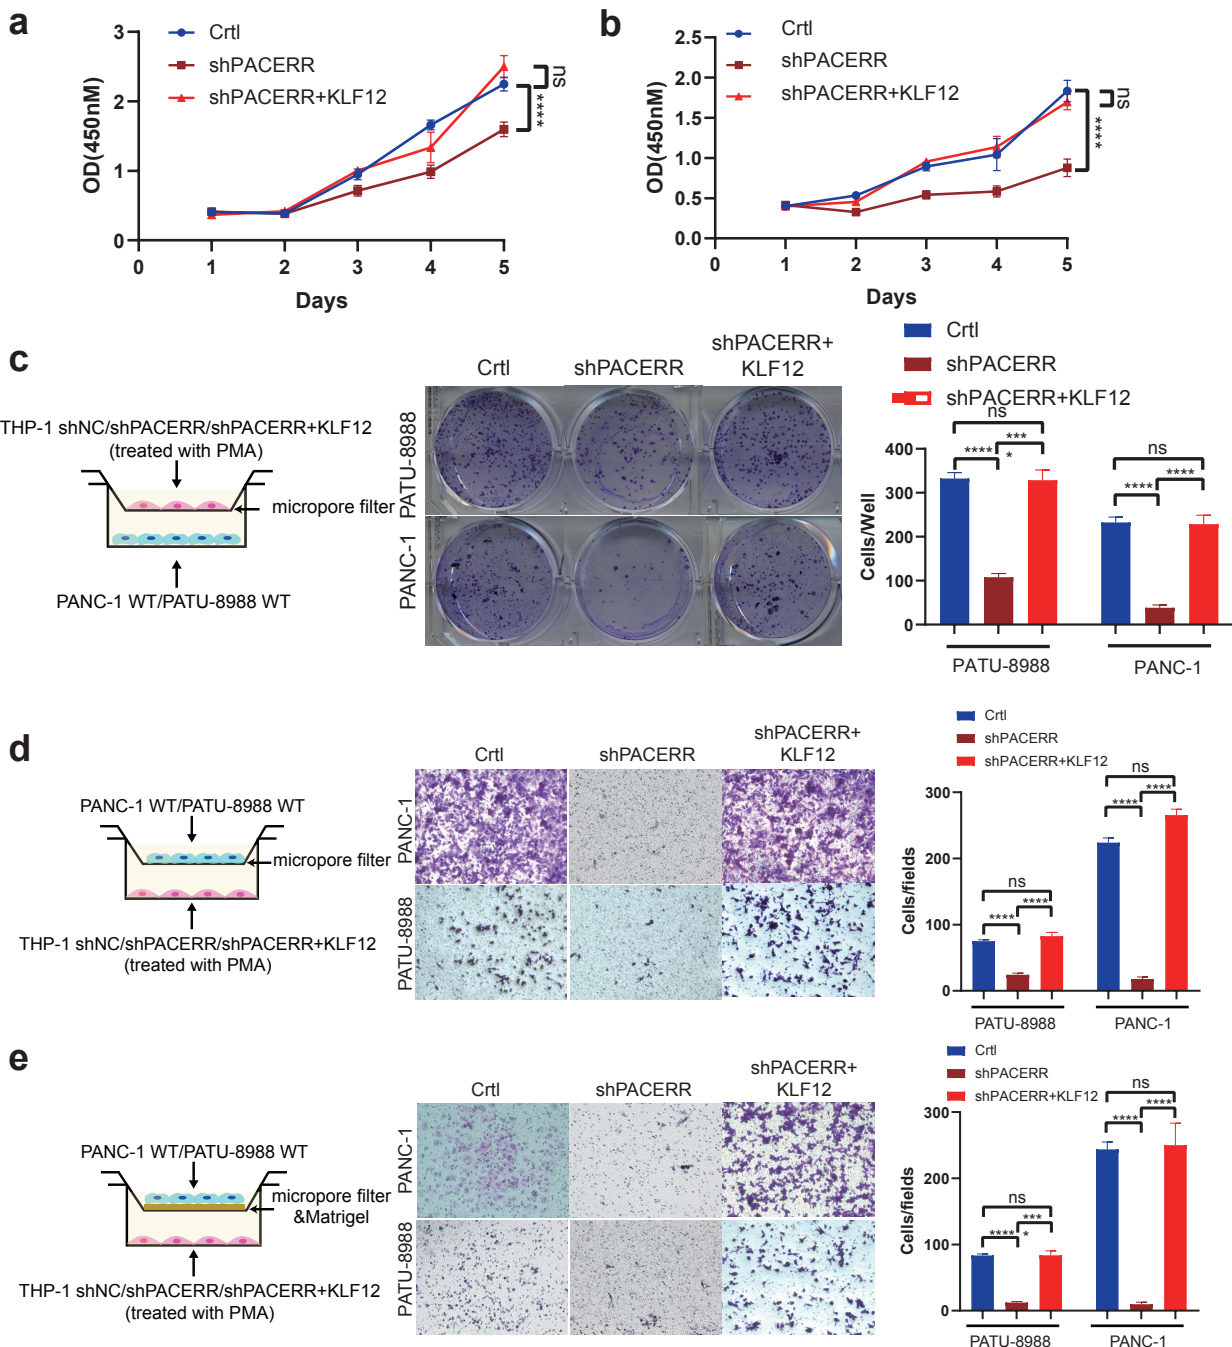

**Figure S8**

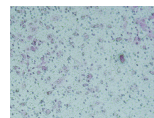



**a**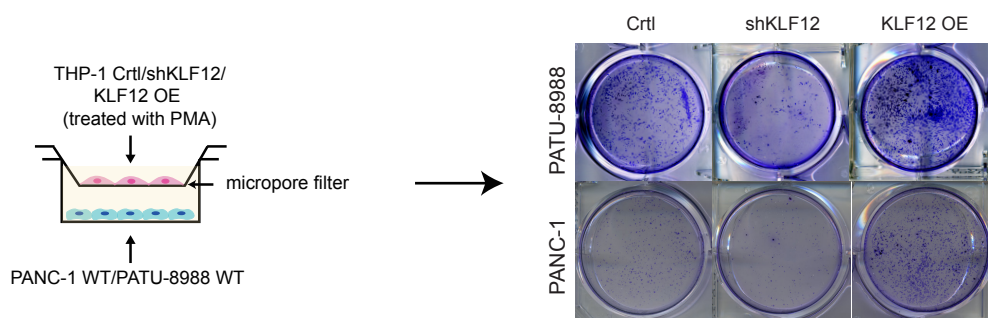**b**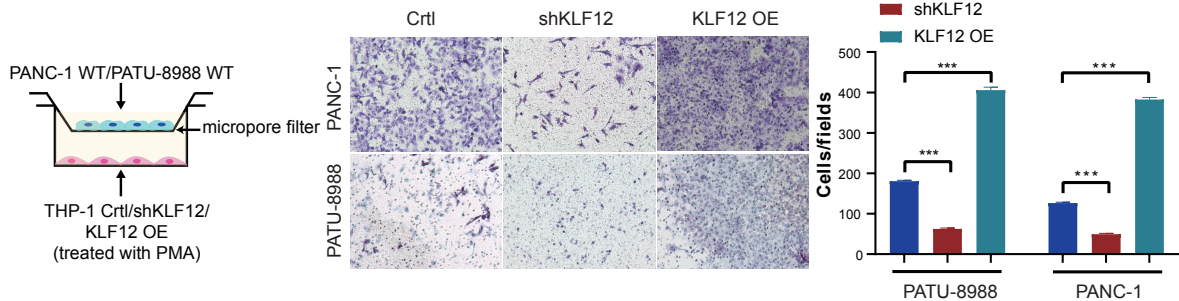**c**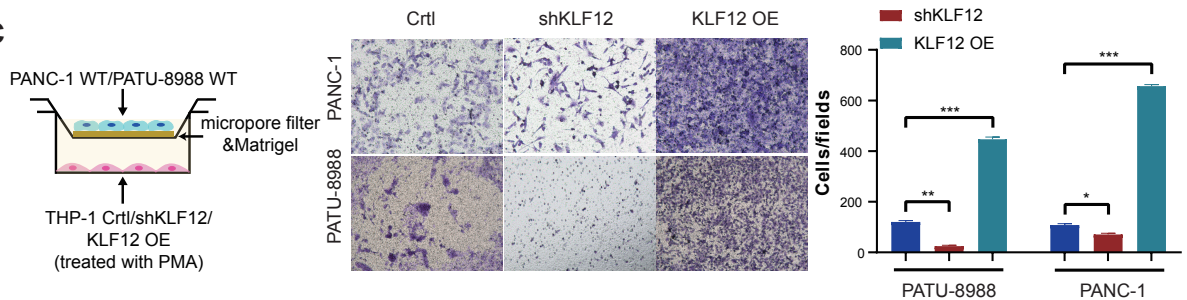**Figure S9**

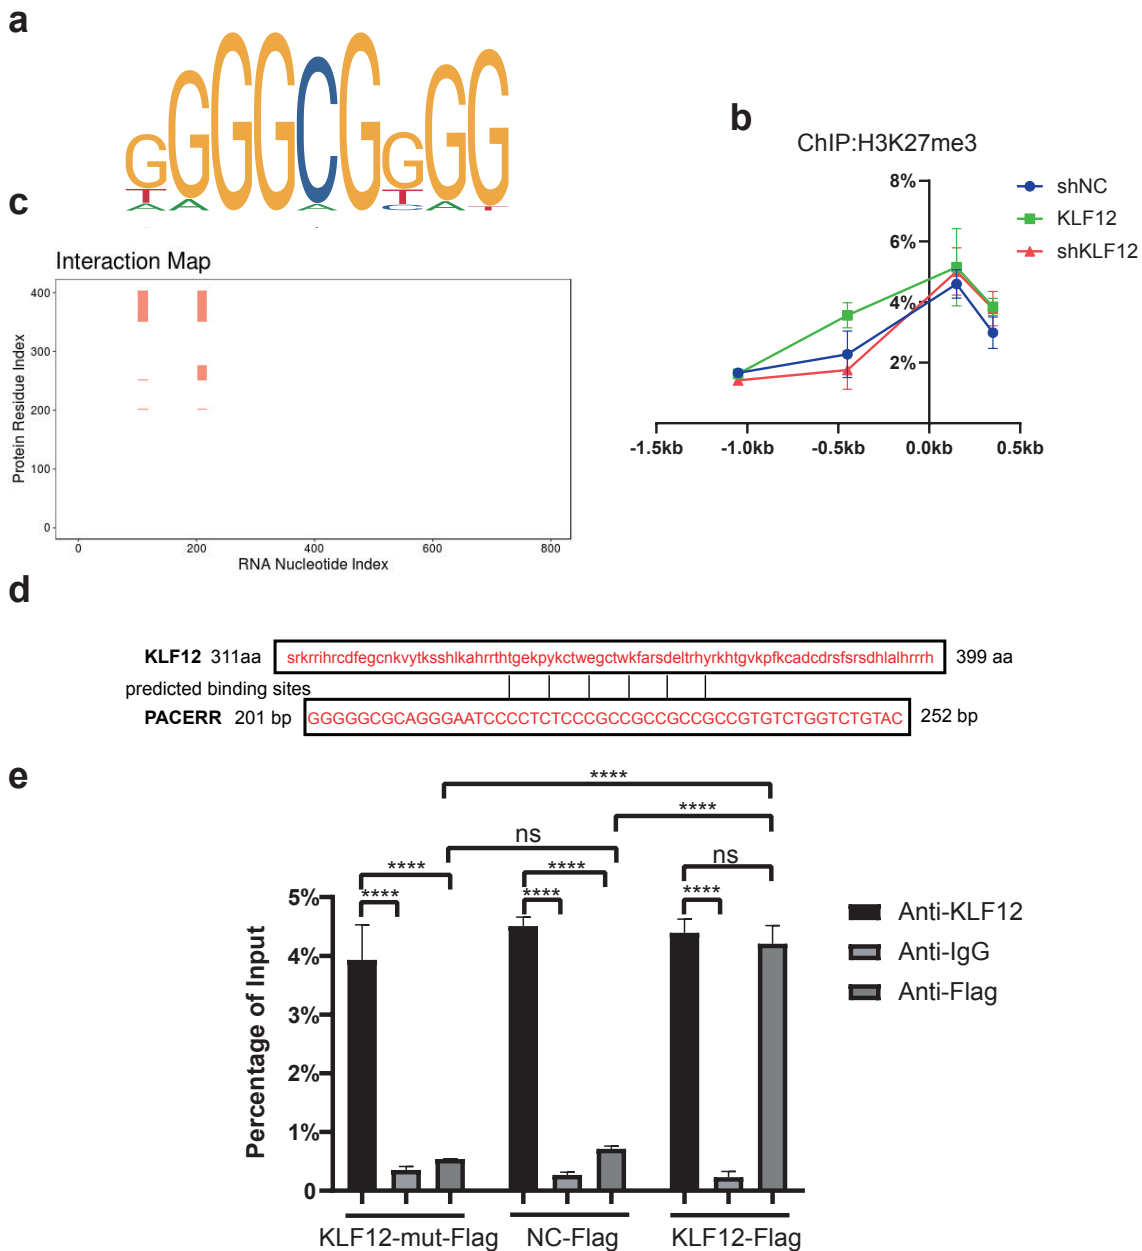

Figure S10

**a**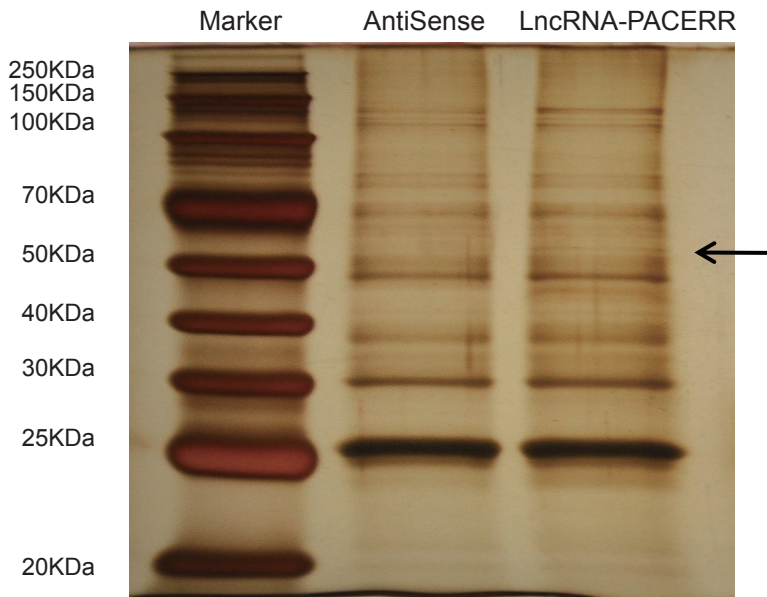**b**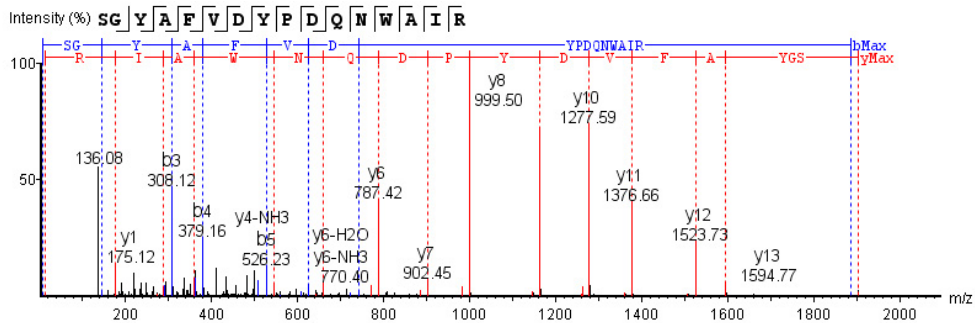**Figure S11**



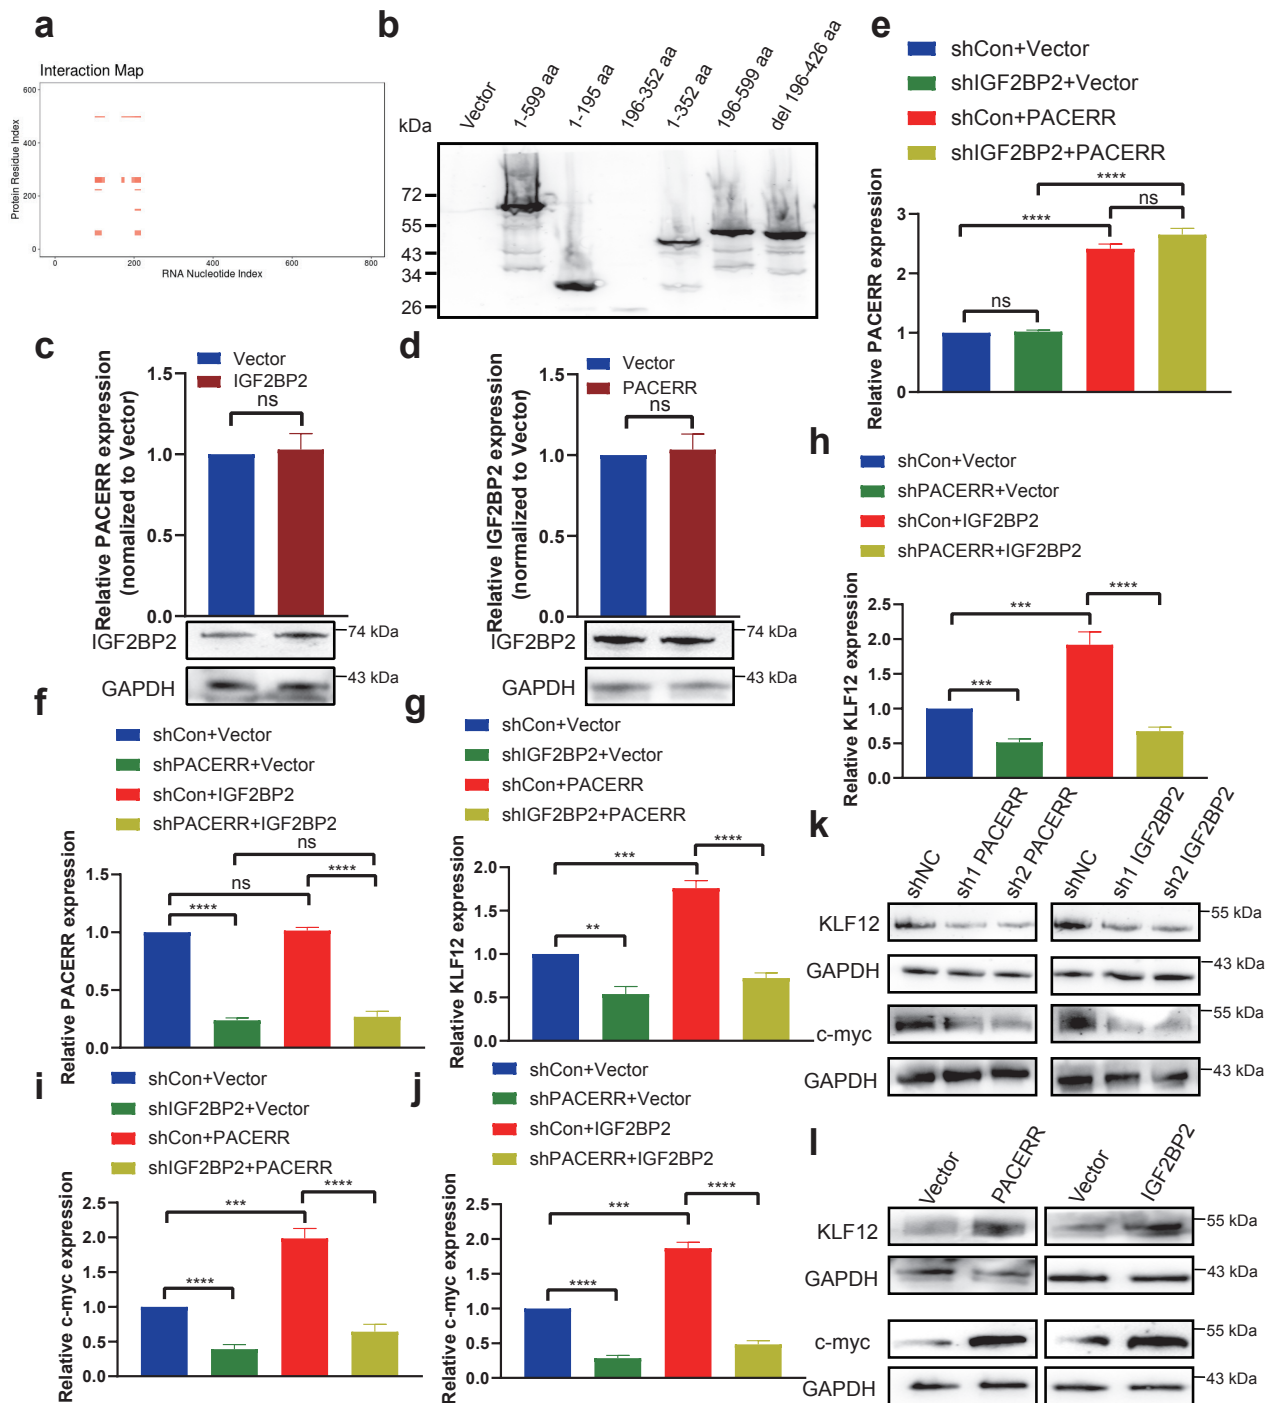

**Figure S12**

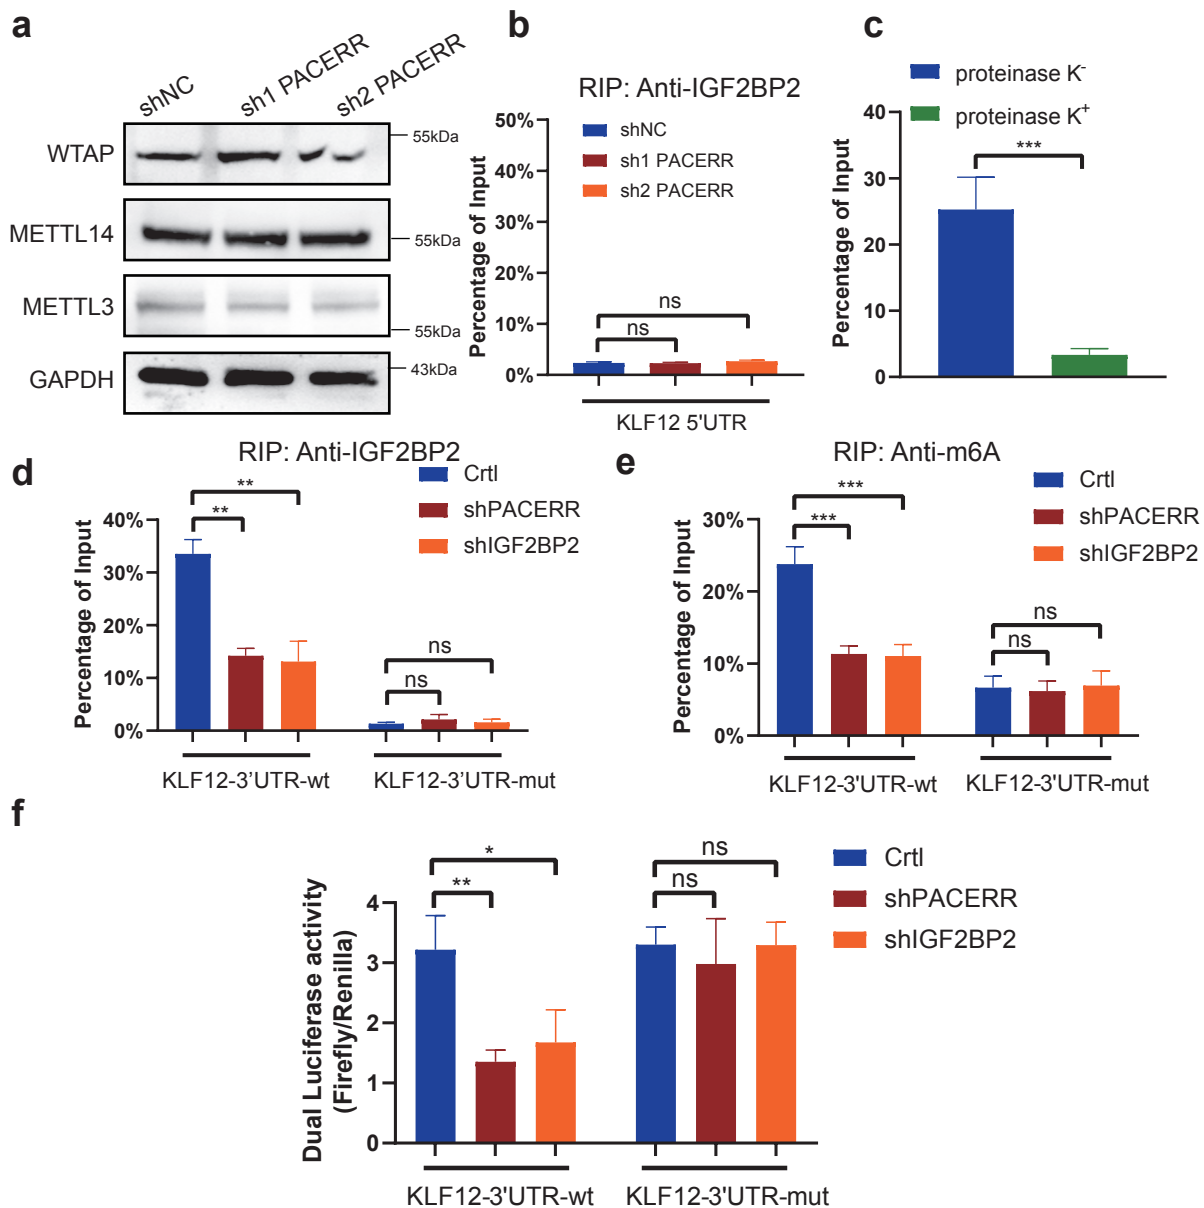

**Figure S13**
